# Supplementary material
Source: publisher figshare collection journal article supplement (https://frontiersin.figshare.com/ndownloader/files/11633441)
Supplement: Supplementary file [file 11633441]

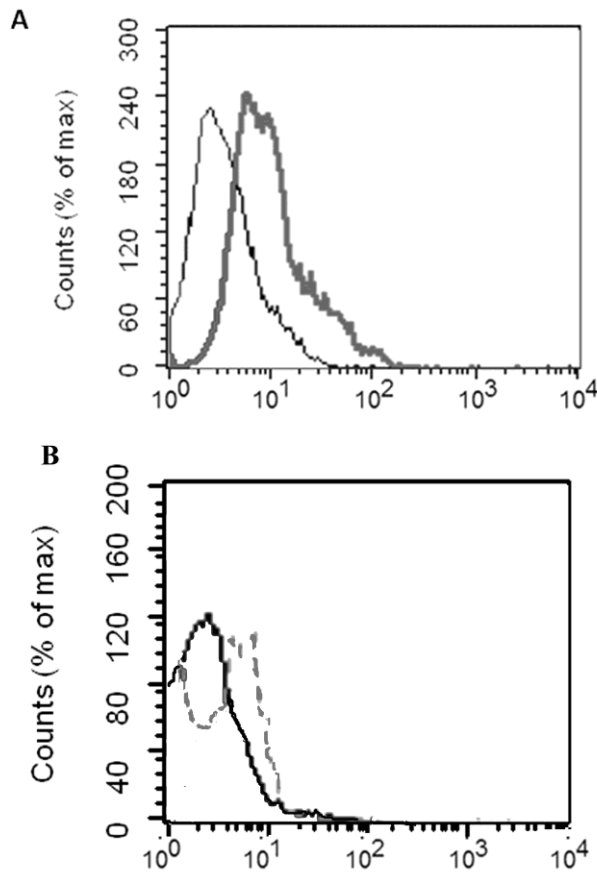

SUPPLEMENTARY FIGURE 1

**Figure 1 -  $\alpha_D\beta_2$  expression increased in wild type (WT) infected mice and it did not appear in infected  $\alpha_D\beta_2^{-/-}$  deficient mice.**

Wild type (WT) and  $\alpha_D\beta_2^{-/-}$  mice were infected with *S. Typhimurium* by intraperitoneal injection ( $10^5$  CFU/animal). Control animals were sham-infected by intraperitoneal injection of sterile, apyrogenic saline. After 72h of infection, we collected leukocytes by peritoneal lavage for analysis of  $\alpha_D\beta_2$  expression by flow cytometry, as described in “Materials in Methods” (MIF, mean fluorescence intensity). Histograms indicating the  $\alpha_D\beta_2$  expression in peritoneal cells from (A) Control and infected WT animals and (B) control and infected  $\alpha_D\beta_2^{-/-}$  animals are shown. (A) Thin black line represents cells from control WT and thick gray line cells from WT infected mice. (B) thick black line represents cell from  $\alpha_D\beta_2^{-/-}$  control mice and

dashed gray line cells from  $\alpha_D^{-/-}$  infected mice. The Y axis indicates cell number and the X axis indicates fluorescence intensity.
